# Supplementary material for: Duplex Real-Time PCR Assays for the Simultaneous Detection and Quantification of Botryosphaeriaceae Species Causing Canker Diseases in Woody Crops
Source: MDPI journal article supplement (doi:10.3390/plants12112205), 2023-06-02
Supplement: s1 [file s1]

**Supplementary Table S1.** GenBank Accession number of rRNA internal transcribed spacer (ITS) and translation elongation factor 1 alpha (*tef1*) gene of *Botryosphaeriaceae* isolates from almond, avocado and blueberry.

| Species                            | Isolate ID | Host      | Variety    | GenBank Accession number |             |
|------------------------------------|------------|-----------|------------|--------------------------|-------------|
|                                    |            |           |            | ITS                      | <i>tef1</i> |
| <i>Botryosphaeria dothidea</i>     | Bd ALM1    | Almond    | -          | OQ672339                 | OQ676462    |
|                                    | Bd ALM2    | Almond    | Marta      | OQ672340                 | OQ676463    |
|                                    | Bd ALM3    | Almond    | Guara      | OQ672341                 | OQ676464    |
|                                    | Bd ALM4    | Almond    | Soleta     | OQ672342                 | OQ676465    |
|                                    | Bd ALM6    | Almond    | Soleta     | OQ672343                 | OQ676466    |
|                                    | Bd ALM7    | Almond    | Vairo      | OQ672344                 | OQ676467    |
|                                    | Bd ALM8    | Almond    | Vairo      | OQ672345                 | OQ676468    |
|                                    | Bd ALM9    | Almond    | Marcona    | OQ672346                 | OQ676469    |
|                                    | Bd ALM10   | Almond    | Soleta     | OQ672347                 | OQ676470    |
|                                    | Bd ALM11   | Almond    | Lauranne   | OQ672348                 | OQ676471    |
|                                    | Bd ALM12   | Almond    | Lauranne   | OQ672349                 | OQ676472    |
|                                    | Bd ALM13   | Almond    | Soleta     | OQ672350                 | OQ676473    |
|                                    | Bd ALM14   | Almond    | Belona     | OQ672351                 | OQ676474    |
|                                    | Bd ALM15   | Almond    | Belona     | OQ672352                 | OQ676475    |
|                                    | Bd ALM16   | Almond    | Belona     | OQ672353                 | OQ676476    |
|                                    | Bd ALM17   | Almond    | Belona     | OQ672354                 | OQ676477    |
|                                    | ALMTOR1    | Almond    | Marcona    | OQ672355                 | OQ676478    |
|                                    | Bo.13.2    | Blueberry | -          | KC556959                 | KC556963    |
| <i>Neofusicoccum parvum</i>        | Np ALM1    | Almond    | Lauranne   | OQ672356                 | OQ676479    |
|                                    | Np ALM2    | Almond    | Rootpac-40 | OQ672357                 | OQ676480    |
|                                    | Np ALM5    | Almond    | Soleta     | OQ672358                 | OQ676481    |
|                                    | NF 161     | Avocado   | Hass       | OQ672359                 | OQ676482    |
|                                    | NF 152     | Avocado   | Hass       | OQ672360                 | OQ676483    |
|                                    | Bo.6.1     | Blueberry | -          | KC556960                 | KC556961    |
| <i>Neofusicoccum luteum</i>        | NF 146     | Avocado   | Hass       | OQ672362                 | OQ676485    |
| <i>Neofusicoccum mediterraneum</i> | Nm ALM3    | Almond    | Rootpac-40 | OQ672361                 | OQ676484    |
| <i>Neofusicoccum australe</i>      | Bo.8       | Blueberry | -          | KC556958                 | KC556962    |
| <i>Diplodia seriata</i>            | Ds ALM1    | Almond    | Guara      | OQ672363                 | OQ676486    |
| <i>Macrophomina phaseolina</i>     | MpALM 1    | Almond    | GxN-15     | OQ672364                 | OQ676487    |
| <i>Lasioidiplodia theobromae</i>   | L.2        | Blueberry | -          | MK542377                 | MK570085    |

**Table S2.** *In silico* analysis of the specificity of qPCR primers and probes for the detection of *Neofusicoccum parvum* and *Botryosphaeria dothidea* affecting Mediterranean woody crops

| Host   | Species detected in each crop      | <i>Neofusicoccum parvum</i> qPCR |                |       | <i>Botryosphaeria dothidea</i> qPCR |                |       | References                |
|--------|------------------------------------|----------------------------------|----------------|-------|-------------------------------------|----------------|-------|---------------------------|
|        |                                    | Forward primer                   | Reverse primer | Probe | Forward primer                      | Reverse primer | Probe |                           |
|        |                                    | Np-F                             | Np-R           | Np-P  | Bd-F                                | Bd-R           | Bd-P  |                           |
| Almond | <i>Botryosphaeria dothidea</i>     | -                                | -              | -     | +                                   | +              | +     | 16; 5; 13; 23; 18         |
|        | <i>Diplodia corticola</i>          | -                                | -              | -     | +                                   | -              | -     | 15                        |
|        | <i>Diplodia gallae</i>             | -                                | -              | -     | -                                   | -              | -     | 18                        |
|        | <i>Diplodia mutila</i>             | -                                | -              | -     | -                                   | -              | -     | 16; 15; 18                |
|        | <i>Diplodia olivarum</i>           | -                                | -              | -     | -                                   | -              | +     | 21; 5                     |
|        | <i>Diplodia seriata</i>            | -                                | -              | -     | -                                   | -              | +     | 21; 16; 5; 13; 15; 23; 18 |
|        | <i>Neofusicoccum arbuti</i>        | +                                | +              | -     | -                                   | -              | -     | 16                        |
|        | <i>Neofusicoccum australe</i>      | -                                | -              | -     | -                                   | -              | -     | 5                         |
|        | <i>Neofusicoccum luteum</i>        | -                                | +              | -     | -                                   | -              | -     | 21                        |
|        | <i>Neofusicoccum mediterraneum</i> | -                                | -              | -     | -                                   | -              | -     | 21; 16; 13; 15; 23        |
|        | <i>Neofusicoccum nonquaesitum</i>  | +                                | +              | -     | -                                   | -              | -     | 13; 23                    |
|        | <i>Neofusicoccum parvum</i>        | +                                | +              | +     | -                                   | -              | -     | 21; 16; 5; 13; 15; 18     |
|        | <i>Neofusicoccum vitifusiforme</i> | +                                | -              | -     | -                                   | -              | -     | 16                        |
|        | <i>Dothiorella iberica</i>         | -                                | -              | -     | -                                   | -              | -     | 16; 15; 23                |
|        | <i>Dothiorella prunicola</i>       | -                                | -              | -     | -                                   | -              | -     | 25                        |
|        | <i>Dothiorella sarmentorum</i>     | -                                | -              | -     | -                                   | -              | -     | 13; 15; 23                |
|        | <i>Dothiorella viticola</i>        | -                                | -              | -     | -                                   | -              | -     | 16; 15                    |
|        | <i>Lasiodiplodia theobromae</i>    | -                                | -              | -     | -                                   | -              | -     | 16; 18; 22                |
|        | <i>Neoscytalidium dimidiatum</i>   | -                                | -              | -     | -                                   | -              | -     | 16; 15; 23                |
|        | <i>Macrophomina phaseolina</i>     | -                                | -              | -     | -                                   | -              | -     | 13; 23                    |
|        | <i>Botryosphaeria dothidea</i>     | -                                | -              | -     | +                                   | +              | +     | 46                        |
|        | <i>Diplodia corticola</i>          | -                                | -              | -     | +                                   | -              | -     | 25                        |
|        | <i>Diplodia mutila</i>             | -                                | -              | -     | -                                   | -              | -     | 46                        |
|        | <i>Diplodia seriata</i>            | -                                | -              | -     | -                                   | -              | +     | 25                        |
|        | <i>Diplodia sp.1</i>               | -                                | -              | -     | -                                   | -              | -     | 25                        |

|           |                                       |   |   |   |   |   |   |    |
|-----------|---------------------------------------|---|---|---|---|---|---|----|
| Grapevine | <i>Dothiorella sarmentorum</i>        | - | - | - | - | - | - | 25 |
|           | <i>Dothiorella striata</i>            | - | - | - | - | - | - | 25 |
|           | <i>Dothiorella vinea-gemmae</i>       | - | - | - | - | - | - | 25 |
|           | <i>Dothiorella viticola</i>           | - | - | - | - | - | - | 46 |
|           | <i>Lasiodiplodia crassispora</i>      | - | - | - | - | - | - | 25 |
|           | <i>Lasiodiplodia exigua</i>           | - | - | - | - | - | - | 46 |
|           | <i>Lasiodiplodia gilanensis</i>       | - | - | - | - | - | - | 25 |
|           | <i>Lasiodiplodia mahajangana</i>      | - | - | - | - | - | - | 25 |
|           | <i>Lasiodiplodia mediterranea</i>     | - | - | - | - | - | - | 25 |
|           | <i>Lasiodiplodia missouriana</i>      | - | - | - | - | - | - | 46 |
|           | <i>Lasiodiplodia plurivora</i>        | - | - | - | - | - | - | 25 |
|           | <i>Lasiodiplodia theobromae</i>       | - | - | - | - | - | - | 46 |
|           | <i>Lasiodiplodia viticola</i>         | - | - | - | - | - | - | 25 |
|           | <i>Lasiodiplodia vitis</i>            | - | - | - | - | - | - | 25 |
|           | <i>Neofusicoccum australe</i>         | - | - | - | - | - | - | 46 |
|           | <i>Neofusicoccum kwambonambiense</i>  | + | + | - | - | - | - | 48 |
|           | <i>Neofusicoccum luteum</i>           | - | + | - | - | - | - | 48 |
|           | <i>Neofusicoccum mediterraneum</i>    | - | - | - | - | - | - | 46 |
|           | <i>Neofusicoccum parvum</i>           | + | + | + | - | - | - | 46 |
|           | <i>Neofusicoccum ribis</i>            | + | + | + | - | - | - | 52 |
|           | <i>Neofusicoccum stellenboschiana</i> | - | + | - | - | - | - | 25 |
|           | <i>Neofusicoccum viticlavatum</i>     | + | - | - | - | - | - | 25 |
|           | <i>Neofusococcum vitifusiforme</i>    | + | - | - | - | - | - | 25 |
|           | <i>Neoscytalidium dimidiatum</i>      | - | - | - | - | - | - | 46 |
|           | <i>Neoscytalidium sp.1</i>            | - | - | - | - | - | - | 25 |
|           | <i>Sphaeropsis porosa</i>             | - | - | - | - | - | - | 25 |
|           | <i>Botryosphaeria dothidea</i>        | - | - | - | + | + | + | 5  |
|           | <i>Diplodia africana</i>              | - | - | - | - | - | - | 5  |
|           | <i>Diplodia mutila</i>                | - | - | - | - | - | - | 5  |
|           | <i>Diplodia pinea</i>                 | - | - | - | - | - | - | 5  |
|           | <i>Diplodia rosulata</i>              | - | - | - | - | - | - | 5  |
|           | <i>Diplodia sapinea</i>               | - | - | - | - | - | - | 25 |

|             |                                       |   |   |   |   |   |   |        |
|-------------|---------------------------------------|---|---|---|---|---|---|--------|
| Prunus spp. | <i>Diplodia seriata</i>               | - | - | - | - | - | + | 5      |
|             | <i>Dothiorella iberica</i>            | - | - | - | - | - | - | 46     |
|             | <i>Dothiorella sarmentorum</i>        | - | - | - | - | - | - | 46     |
|             | <i>Lasiodiplodia plurivora</i>        | - | - | - | - | - | - | 5      |
|             | <i>Lasiodiplodia pseudotheobromae</i> | - | - | - | - | - | - | 51     |
|             | <i>Lasiodiplodia thebromae</i>        | - | - | - | - | - | - | 5      |
|             | <i>Macrophomina phaseolina</i>        | - | - | - | - | - | - | 5      |
|             | <i>Neofusicoccum australe</i>         | - | - | - | - | - | - | 5      |
|             | <i>Neofusicoccum mediterraneum</i>    | - | - | - | - | - | - | 5      |
|             | <i>Neofusicoccum nonquaesitum</i>     | + | + | - | - | - | - | 5      |
|             | <i>Neofusicoccum parvum</i>           | + | + | + | - | - | - | 5      |
|             | <i>Neofusicoccum ribis</i>            | + | + | + | - | - | - | 5      |
|             | <i>Neofusicoccum stellenboschiana</i> | - | + | - | - | - | - | 25     |
|             | <i>Neofusicoccum vitifusiforme</i>    | + | - | - | - | - | - | 5      |
|             | <i>Neoscytalidium dimidiatum</i>      | - | - | - | - | - | - | 51     |
|             | <i>Spencermartinsia viticola</i>      | - | - | - | - | - | - | 5      |
| Walnut      | <i>Botryosphaeria dothidea</i>        | - | - | - | + | + | + | 24     |
|             | <i>Diplodia mutila</i>                | - | - | - | - | - | - | 24     |
|             | <i>Diplodia seriata</i>               | - | - | - | - | - | + | 24     |
|             | <i>Dothiorella iberica</i>            | - | - | - | - | - | - | 24     |
|             | <i>Lasiodiplodia citricola</i>        | - | - | - | - | - | - | 46     |
|             | <i>Lasiodiplodia gilanensis</i>       | - | - | - | - | - | - | 24     |
|             | <i>Lasiodiplodia theobromae</i>       | - | - | - | - | - | - | 24     |
|             | <i>Neofusicoccum luteum</i>           | - | + | - | - | - | - | 24     |
|             | <i>Neofusicoccum mediterraneum</i>    | - | - | - | - | - | - | 24     |
|             | <i>Neofusicoccum nonquasitum</i>      | + | + | - | - | - | - | 46; 24 |
|             | <i>Neofusicoccum parvum</i>           | + | + | + | - | - | - | 24     |
|             | <i>Neofusicoccum vitifusiforme</i>    | + | - | - | - | - | - | 46     |
|             | <i>Neoscytalidium dimidiatum</i>      | - | - | - | - | - | - | 24     |
|             | <i>Botryosphaeria dothidea</i>        | - | - | - | + | + | + | 24     |
|             | <i>Diplodia pseudoseriata</i>         | - | - | - | - | - | - | 25     |

|           |                                       |   |   |   |   |   |   |    |
|-----------|---------------------------------------|---|---|---|---|---|---|----|
| Pistachio | <i>Diplodia seriata</i>               | - | - | - | - | - | + | 24 |
|           | <i>Dothiorella iberica</i>            | - | - | - | - | - | - | 24 |
|           | <i>Dothiorella sarmentorum</i>        | - | - | - | - | - | - | 24 |
|           | <i>Dothiotella viticola</i>           | - | - | - | - | - | - | 24 |
|           | <i>Lasiodiplodia americana</i>        | - | - | - | - | - | - | 24 |
|           | <i>Lasiodiplodia citricola</i>        | - | - | - | - | - | - | 24 |
|           | <i>Lasiodiplodia gilensis</i>         | - | - | - | - | - | - | 24 |
|           | <i>Lasiodiplodia pseudotheobromae</i> | - | - | - | - | - | - | 51 |
|           | <i>Lasiodiplodia theobromae</i>       | - | - | - | - | - | - | 24 |
|           | <i>Macrophomina phaseolina</i>        | - | - | - | - | - | - | 24 |
|           | <i>Neofusicoccum australe</i>         | - | - | - | - | - | - | 24 |
|           | <i>Neofusicoccum hellenicum</i>       | + | - | - | - | - | - | 46 |
|           | <i>Neofusicoccum mediterraneum</i>    | - | - | - | - | - | - | 24 |
|           | <i>Neofusicoccum parvum</i>           | - | - | - | - | - | - | 24 |
|           | <i>Neofusicoccum pistaciae</i>        | - | - | - | - | - | - | 25 |
|           | <i>Neofusicoccum vitifusiforme</i>    | + | - | - | - | - | - | 24 |
|           | <i>Neoscytalidium dimidiatum</i>      | - | - | - | - | - | - | 24 |
| Olive     | <i>Barriopsis barriana</i>            | - | - | - | - | - | - | 25 |
|           | <i>Botryosphaeria dothidea</i>        | - | - | - | + | + | + | 24 |
|           | <i>Diplodia corticola</i>             | - | - | - | + | - | - | 24 |
|           | <i>Diplodia mutila</i>                | - | - | - | - | - | - | 24 |
|           | <i>Diplodia olivarum</i>              | - | - | - | - | - | - | 24 |
|           | <i>Diplodia pinea</i>                 | - | - | - | - | - | - | 24 |
|           | <i>Diplodia scrobiculata</i>          | - | - | - | - | - | - | 24 |
|           | <i>Diplodia seriata</i>               | - | - | - | - | - | + | 24 |
|           | <i>Dothiorella iberica</i>            | - | - | - | - | - | - | 24 |
|           | <i>Dothiorella iranica</i>            | - | - | - | - | - | - | 25 |
|           | <i>Lasiodiplodia hormozganensis</i>   | - | - | - | - | - | - | 25 |
|           | <i>Lasiodiplodia pseudotheobromae</i> | - | - | - | - | - | - | 51 |
|           | <i>Lasiodiplodia theobromae</i>       | - | - | - | - | - | - | 24 |
|           | <i>Macrophomina phaseolina</i>        | - | - | - | - | - | - | 24 |
|           | <i>Neofusicoccum australe</i>         | - | - | - | - | - | - | 24 |

|         |                                       |   |   |   |   |   |   |    |
|---------|---------------------------------------|---|---|---|---|---|---|----|
| Avocado | <i>Neofusicoccum luteum</i>           | - | + | - | - | - | - | 24 |
|         | <i>Neofusicoccum mediterraneum</i>    | - | - | - | - | - | - | 24 |
|         | <i>Neofusicoccum parvum</i>           | + | + | + | - | - | - | 24 |
|         | <i>Neofusicoccum vitifusiforme</i>    | + | - | - | - | - | - | 24 |
|         | <i>Botryosphaeria dothidea</i>        | - | - | - | + | + | + | 12 |
|         | <i>Diplodia mutila</i>                | - | - | - | - | - | - | 12 |
|         | <i>Diplodia pseudoseriata</i>         | - | - | - | - | - | - | 12 |
|         | <i>Diplodia seriata</i>               | - | - | - | - | - | + | 12 |
|         | <i>Dothiorella iberica</i>            | - | - | - | - | - | - | 12 |
|         | <i>Lasiodiplodia mahajangana</i>      | - | - | - | - | - | - | 25 |
|         | <i>Lasiodiplodia pseudothebromae</i>  | - | - | - | - | - | - | 12 |
|         | <i>Lasiodiplodia thebromae</i>        | - | - | - | - | - | - | 12 |
|         | <i>Neofusicoccum australe</i>         | - | - | - | - | - | - | 12 |
|         | <i>Neofusicoccum luteum</i>           | - | + | - | - | - | - | 12 |
|         | <i>Neofusicoccum mangiferae</i>       | + | + | - | - | - | - | 12 |
|         | <i>Neofusicoccum mediterraneum</i>    | - | - | - | - | - | - | 12 |
|         | <i>Neofusicoccum nonquasitum</i>      | + | + | - | - | - | - | 12 |
|         | <i>Neofusicoccum parvum</i>           | + | + | + | - | - | - | 12 |
|         | <i>Neofusicoccum ribis</i>            | + | + | + | - | - | - | 25 |
|         | <i>Neofusicoccum stellenboschiana</i> | - | + | - | - | - | - | 25 |
|         | <i>Pseudofusicoccum kimberleyense</i> | - | - | - | - | - | - | 25 |
|         | <i>Barriopsis stevensiana</i>         | - | - | - | - | - | - | 25 |
|         | <i>Botryosphaeria fabicerciana</i>    | - | - | - | + | - | - | 49 |
|         | <i>Diplodia citricarpa</i>            | - | - | - | - | - | - | 25 |
|         | <i>Diplodia mutila</i>                | - | - | - | - | - | - | 62 |
|         | <i>Diplodia seriata</i>               | - | - | - | - | - | + | 62 |
|         | <i>Dothiorella citrícola</i>          | - | - | - | - | - | - | 25 |
|         | <i>Dothiorella iberica</i>            | - | - | - | - | - | - | 62 |
|         | <i>Dothiorella plurívora</i>          | - | - | - | - | - | - | 25 |
|         | <i>Dothiorella striata</i>            | - | - | - | - | - | - | 25 |
|         | <i>Dothiorella vitícola</i>           | - | - | - | - | - | - | 62 |

|             |                                       |   |   |   |   |   |   |        |
|-------------|---------------------------------------|---|---|---|---|---|---|--------|
| Citrus spp. | <i>Lasiodiplodia citricola</i>        | - | - | - | - | - | - | 62     |
|             | <i>Lasiodiplodia gilensis</i>         | - | - | - | - | - | - | 25     |
|             | <i>Lasiodiplodia hormozganensis</i>   | - | - | - | - | - | - | 62     |
|             | <i>Lasiodiplodia iraniensis</i>       | - | - | - | - | - | - | 62     |
|             | <i>Lasiodiplodia mahajangana</i>      | - | - | - | - | - | - | 25     |
|             | <i>Lasiodiplodia parva</i>            | - | - | - | - | - | - | 62     |
|             | <i>Lasiodiplodia pseudotheobromae</i> | - | - | - | - | - | - | 62     |
|             | <i>Lasiodiplodia theobromae</i>       | - | - | - | - | - | - | 62     |
|             | <i>Lasiodiplodia subglosa</i>         | - | - | - | - | - | - | 62     |
|             | <i>Neofusicoccum australe</i>         | - | - | - | - | - | - | 62     |
|             | <i>Neofusicoccum mediterraneum</i>    | - | - | - | - | - | - | 62     |
|             | <i>Neofusicoccum parvum</i>           | + | + | + | - | - | - | 62     |
|             | <i>Neoscytalidium dimidiatum</i>      | - | - | - | - | - | - | 62     |
|             | <i>Neoscytalidium hyalinum</i>        | - | - | - | - | - | - | 62     |
| Blueberry   | <i>Spencermartinsia viticola</i>      | - | - | - | - | - | - | 62     |
|             | <i>Sphaeropsis citrigena</i>          | - | - | - | - | - | - | 25     |
|             | <i>Botryosphaeria dothidea</i>        | - | - | - | + | + | + | 48; 25 |
|             | <i>Botryosphaeria corticis</i>        | - | - | - | + | - | - | 48     |
|             | <i>Lasiodiplodia citricola</i>        | - | - | - | - | - | - | 25     |
|             | <i>Lasiodiplodia laeliocattleyae</i>  | - | - | - | - | - | - | 53     |
|             | <i>Lasiodiplodia lignicola</i>        | - | - | - | - | - | - | 25     |
|             | <i>Lasiodiplodia pseudotheobromae</i> | - | - | - | - | - | - | 53     |
|             | <i>Lasiodiplodia theobromae</i>       | - | - | - | - | - | - | 53     |
|             | <i>Neofusicoccum arbuti</i>           | + | + | - | - | - | - | 53     |
|             | <i>Neofusicoccum australe</i>         | - | - | - | - | - | - | 48     |
|             | <i>Neofusicoccum eucaliptorum</i>     | - | + | - | - | - | - | 48     |
|             | <i>Neofusicoccum nonquaesitum</i>     | + | + | - | - | - | - | 25     |
|             | <i>Neofusicoccum kwambonambiense</i>  | + | + | - | - | - | - | 53     |
|             | <i>Neofusicoccum parvum</i>           | + | + | + | - | - | - | 48     |
|             | <i>Neofusicoccum ribis</i>            | + | + | + | - | - | - | 53     |

---

62. Mondragón-Flores A, Rodríguez-Alvarado G, Gómez-Dorantes N, Guerra-Santos JJ, Fernández-Pavía SP (2021). *Botryosphaeriaceae* : a complex, diverse and cosmopolitan family of fungi. Revista Mexicana Ciencias Agrícolas volume 12 number 4 May 16
